# Supplementary material for: De novo assembly of viral quasispecies using overlap graphs
Source: PubMed Central journal article supplement — Genome Res. 2017 May;27(5):835–48. doi: 10.1101/gr.215038.116 (PMC5411778; doi:10.1101/gr.215038.116), 2017-05
Supplement: supp_gr.215038.116_Supplemental_Fig_S2.pdf [file supp_gr.215038.116_Supplemental_Fig_S2.pdf]

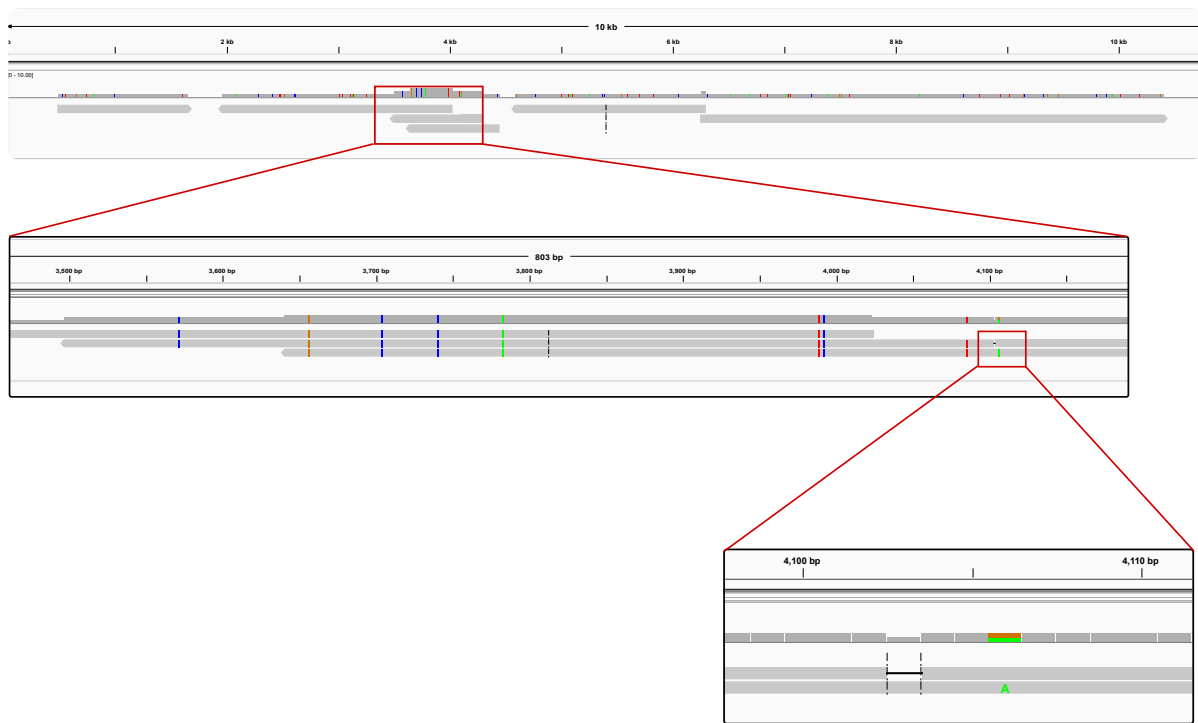

Supplemental Fig S2: IGV screenshot of *Stage c* contigs of ZIKV patient sample, zooming in on the variation between the two haplotypes observed: a deletion at position 4103 followed by a SNP at position 4106.
