# Supplementary material for: De novo assembly of viral quasispecies using overlap graphs
Source: PubMed Central journal article supplement — Genome Res. 2017 May;27(5):835–48. doi: 10.1101/gr.215038.116 (PMC5411778; doi:10.1101/gr.215038.116), 2017-05
Supplement: supp_gr.215038.116_Supplemental_Fig_S3.pdf [file supp_gr.215038.116_Supplemental_Fig_S3.pdf]

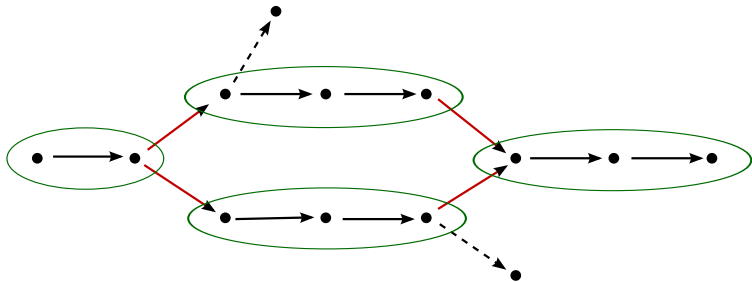

Supplemental Fig S2: An illustration of tips and branching edges in the overlap graph. In iterations of the algorithm without clique enumeration, we remove all single transitive edges as well as tips and branching edges. In this example, tips are depicted as dashed edges while branching edges are colored red. The green ellipses indicate the clusters formed after removing tips and branches.
