# Supplementary material for: De novo assembly of viral quasispecies using overlap graphs
Source: PubMed Central journal article supplement — Genome Res. 2017 May;27(5):835–48. doi: 10.1101/gr.215038.116 (PMC5411778; doi:10.1101/gr.215038.116), 2017-05
Supplement: supp_gr.215038.116_Supplemental_Table_S2.pdf [file supp_gr.215038.116_Supplemental_Table_S2.pdf]

**Simulated ZIKV mix (20 000x, 3 strains)**

|                    | # contigs<br>≥ 500bp | largest<br>contig | N50   | MAC<br>length<br>(%) | target<br>genomes<br>(%) | N-rate<br>(%) | mismatches<br>(%) | indels<br>(%) |
|--------------------|----------------------|-------------------|-------|----------------------|--------------------------|---------------|-------------------|---------------|
| MLEHaplo           | -                    | -                 | -     | -                    | -                        | -             | -                 | -             |
| PredictHaplo-h-ref | 3                    | 10258             | 10258 | 0                    | 100.0                    | 0.029         | 0                 | 0.042         |
| PredictHaplo-b-ref | 3                    | 10270             | 10270 | 0                    | 100.0                    | 0             | 0                 | 0.003         |
| ShoRAH-h-ref       | -                    | -                 | -     | -                    | -                        | -             | -                 | -             |
| ShoRAH-b-ref       | 156                  | 10251             | 10251 | 0                    | 99.8                     | 0.039         | 2.938             | 0.003         |
| SAVAGE-de-novo     | 6                    | 10257             | 10203 | 0                    | 99.9                     | 0.006         | 0                 | 0             |
| SAVAGE-h-ref       | 6                    | 10264             | 10231 | 0                    | 99.9                     | 0.006         | 0                 | 0             |
| SAVAGE-b-ref       | 4                    | 10267             | 10263 | 0                    | 99.9                     | 0.003         | 0                 | 0             |
| SGA                | 19                   | 1437              | 631   | 0                    | 29.0                     | 0             | 1.377             | 0             |
| SOAPdenovo2        | 38                   | 651               | 513   | 0                    | 39.5                     | 0             | 0.616             | 0             |
| SPAdes             | 11                   | 10269             | 3261  | 0                    | 99.6                     | 0             | 0                 | 0             |
| metaSPAdes         | 12                   | 8620              | 4969  | 0                    | 33.4                     | 0             | 0.691             | 0             |

Supplemental Table S2: Assembly results per method for the 20.000x simulated 3-ZIKV-mix. For reference guided methods we present results using an established, high quality reference genome (h-ref) as well as an ad-hoc, bootstrap reference genome (b-ref). All assemblies were evaluated on the following criteria: number of contigs  $\geq 500$  bp, length of the largest contig, N50 statistic, MissAssembled Contigs (MAC) length relative to total contig length, percentage of the target genomes recovered, percentage of undetermined bases (N), and percentage of mismatches and indels compared to the ground truth.
