# Supplementary material for: De novo assembly of viral quasispecies using overlap graphs
Source: PubMed Central journal article supplement — Genome Res. 2017 May;27(5):835–48. doi: 10.1101/gr.215038.116 (PMC5411778; doi:10.1101/gr.215038.116), 2017-05
Supplement: supp_gr.215038.116_Supplemental_Table_S3.pdf [file supp_gr.215038.116_Supplemental_Table_S3.pdf]

---

**Simulated HIV mix (20 000x, 2x150 bp)**

---

|                | # contigs<br>$\geq 500$ bp | largest<br>contig | N50  | MAC<br>length<br>(%) | target<br>genomes<br>(%) | N-rate<br>(%) | mismatches<br>(%) | indels<br>(%) |
|----------------|----------------------------|-------------------|------|----------------------|--------------------------|---------------|-------------------|---------------|
| SAVAGE-de-novo | 76                         | 5914              | 1244 | 0                    | 98.4                     | 0             | 0.006             | 0             |
| SAVAGE-h-ref   | 59                         | 4093              | 1612 | 0                    | 90.6                     | 0             | 0                 | 0             |
| SAVAGE-b-ref   | 86                         | 2622              | 1222 | 0                    | 95.5                     | 0.002         | 0.004             | 0             |

---

Supplemental Table S3: Assembly results for SAVAGE on the 20.000x simulated 5-HIV-mix with 2x150 bp reads.
