# Supplementary material for: De novo assembly of viral quasispecies using overlap graphs
Source: PubMed Central journal article supplement — Genome Res. 2017 May;27(5):835–48. doi: 10.1101/gr.215038.116 (PMC5411778; doi:10.1101/gr.215038.116), 2017-05
Supplement: supp_gr.215038.116_Supplemental_Table_S4.pdf [file supp_gr.215038.116_Supplemental_Table_S4.pdf]

|               | <i>Simulated mix 600x</i> |                        | <i>Simulated mix 20 000x</i> |                        | <i>Lab mix 20 000x</i> |                        |
|---------------|---------------------------|------------------------|------------------------------|------------------------|------------------------|------------------------|
|               | CPU time (minutes)        | Peak memory usage (GB) | CPU time (minutes)           | Peak memory usage (GB) | CPU time (minutes)     | Peak memory usage (GB) |
| MLEHaplo      | 54                        | 2.2                    | -                            | -                      | -                      | -                      |
| SAVAGE-denovo | 19                        | 0.6                    | 5296                         | 0.9                    | 7495                   | 1.1                    |
| SAVAGE-ref-bg | 6.4                       | 1.3                    | 449                          | 1.7                    | 850                    | 3.0                    |
| ShoRAH        | 12                        | 1.2                    | 32375                        | 10                     | 22256                  | 12                     |
| PredictHaplo  | 7                         | 0.04                   | 223                          | 1.1                    | 158                    | 0.9                    |
| SGA           | 24                        | 0.09                   | 164                          | 0.5                    | 300                    | 0.7                    |
| SOAPdenovo2   | 0.15                      | 0.7                    | 5                            | 9.5                    | 6                      | 8.3                    |
| SPAdes        | 2.0                       | 8.4                    | 46                           | 8.7                    | 166                    | 8.8                    |
| metaSPAdes    | 1.3                       | 8.4                    | 37                           | 8.6                    | 130                    | 8.7                    |

Supplemental Table S4: Runtime and memory usage comparison for specialized viral quasispecies tools MLEHaplo, SAVAGE-denovo, SAVAGE-ref-bg, ShoRAH, and PredictHaplo, and for generic assemblers SGA, SOAPdenovo2, SPAdes, and metaSPAdes. The first four columns show results on simulated HIV data (*simulated mix*, 600x and 20 000x respectively), while the last two columns show results on real HIV data (*lab mix*). SAVAGE-denovo uses more CPU time than SAVAGE-ref-bg, because it has to find all approximate suffix-prefix overlaps without using a reference genome.
