# Supplementary material for: De novo assembly of viral quasispecies using overlap graphs
Source: PubMed Central journal article supplement — Genome Res. 2017 May;27(5):835–48. doi: 10.1101/gr.215038.116 (PMC5411778; doi:10.1101/gr.215038.116), 2017-05
Supplement: supp_gr.215038.116_Supplemental_Table_S5.pdf [file supp_gr.215038.116_Supplemental_Table_S5.pdf]

|                | # contigs<br>$\geq 500\text{bp}$ | largest<br>contig | N50 | genomes<br>covered (%) | N-rate<br>(%) | mismatches<br>(%) | indel rate<br>(%) |
|----------------|----------------------------------|-------------------|-----|------------------------|---------------|-------------------|-------------------|
| <i>Stage a</i> | 1136                             | 1182              | 564 | 84.6                   | 0.097         | 0.162             | 0.039             |
| <i>Stage b</i> | 846                              | 1221              | 588 | 92.6                   | 0.183         | 0.161             | 0.040             |
| <i>Stage c</i> | 188                              | 4858              | 715 | 91.7                   | 0.642         | 0.154             | 0.045             |

Supplemental Table S5: SAVAGE-de-novo contigs evaluated on the 20.000x real HIV mix (*lab mix*) per algorithm stage, illustrating the progression of contig lengths through the three stages.
